# Supplementary material
Source: PubMed Central journal article supplement (PMC3696648)
Supplement: supp_M113.462531_jbc.M113.462531-1.pdf [file supp_M113.462531_jbc.M113.462531-1.pdf]

Unexpected histone H3 tail clipping activity of glutamate dehydrogenase

Papita Mandal, Naveen Verma, Sakshi Chauhan and Raghuvir S. Tomar

Supplementary Figure

Table S1

| Accession | Description                                                                                 | Score            | Coverage | #Unique Peptides  | #Peptides                | #PSMs           | #AAs    | MW [kDa]   | Calc. pI   |
|-----------|---------------------------------------------------------------------------------------------|------------------|----------|-------------------|--------------------------|-----------------|---------|------------|------------|
| P00368    | Glutamate dehydrogenase 1, mitochondrial OS=Gallus gallus GN=GLuD1 PE=1 SV=1 – [DHE3_CHICK] | 252.10           | 20.08    | 4                 | 9                        | 9               | 503     | 55.7       | 8.28       |
|           | A2                                                                                          | Sequence         | #PSMs    | #Protein Groups   | Protein Group Accessions | Modifications   | Area    | IonScore   | Exp Value  |
|           | High                                                                                        | TFAVQQFGNVGLHSmR | 1        | 1                 | P00368                   | M15 (Oxidation) | 1.616E6 | 66         | 4.7222E-05 |
|           | High                                                                                        | HGGTIPVVPTAEFQDR | 1        | 1                 | P00368                   |                 | 9.294E6 | 64         | 7.2711E-05 |
|           | High                                                                                        | YSLDVSVDEVK      | 1        | 1                 | P00368                   |                 | 1.553E7 | 57         | 0.00033478 |
|           | High                                                                                        | YNLGLDLR         | 1        | 2                 | P00366;<br>P00368        |                 | 1.211E7 | 54         | 0.00080865 |
|           | High                                                                                        | VYNEAGLTFT       | 1        | 1                 | P00368                   |                 | 5.383E6 | 52         | 0.00056982 |
|           | High                                                                                        | DIVHSGLAYTmER    | 1        | 2                 | P00366;<br>P00368        | M11 (Oxidation) | 2.696E6 | 50         | 0.0011312  |
|           | High                                                                                        | mVEGFFDR         | 1        | 2                 | P00366;<br>P00368        | M1 (Oxidation)  | 3.037E6 | 49         | 0.00038687 |
|           | High                                                                                        | ALASLmTYK        | 1        | 2                 | P00366;<br>P00368        | M6 (Oxidation)  | 1.005E7 | 42         | 0.0006765  |
| High      | TAAVYVNAIEK                                                                                 | 1                | 2        | P00366;<br>P00368 |                          | 1.989E7         | 39      | 0.01949257 |            |

**Table S1:** Chicken (*Gallus gallus*) peptides/proteins identified by LTQ-Orbitrap MS/MS analysis on MASCOT using Proteome Discoverer 1.3 software.
